# Supplementary material
Source: PubMed Central journal article supplement (PMC4191785)
Supplement: pnas.201321349SI.pdf [file pnas.201321349SI.pdf]

Bluescript SKII(+) DNA. The 30- $\mu$ L assays contained 20 mM Tris-HCl pH = 7.8, 1 mM DTT, 100  $\mu$ g/mL BSA, 8.3 mM MgAc<sub>2</sub>, 1 mM ATP, 0.1 mM of each dNTP, 100 mM NaCl, 200 fmol of template plasmid, 40 pmol of RPA, 200 fmol of RFC, 400 fmol of PCNA trimers, and 5 fmol of Pol  $\delta$  (polymerase to PCNA-loaded primer-template ratio of 1:40, to achieve single-hit criteria). The template plasmid was preincubated with RPA, PCNA, and RFC for 1 min at 30 °C for RPA coating and PCNA loading. Pol  $\delta$  was then added, and the reactions were incubated

at 30 °C for the indicated times. Products were analyzed by electrophoresis on a 2% (wt/vol) denaturing alkaline agarose gel, in the presence of 0.5  $\mu$ g/mL ethidium bromide. A 100-bp ladder was also run on the gel, and photographed under UV illumination. The gel was dried, exposed to a storage phosphor screen and analyzed on a PhosphorImager. Finally, the UV picture and the autoradiograph were overlaid to position the ladder onto the autoradiograph and assess the sizes of the radioactive products.

1. Ayyagari R, Gomes XV, Gordenin DA, Burgers PMJ (2003) Okazaki fragment maturation in yeast. I. Distribution of functions between FEN1 AND DNA2. *J Biol Chem* 278(3):1618–1625.
2. Harrington JJ, Lieber MR (1994) Functional domains within FEN-1 and RAD2 define a family of structure-specific endonucleases: Implications for nucleotide excision repair. *Genes Dev* 8(11):1344–1355.
3. Gomes XV, Gary SL, Burgers PM (2000) Overproduction in Escherichia coli and characterization of yeast replication factor C lacking the ligase homology domain. *J Biol Chem* 275(19):14541–14549.
4. Henricksen LA, Umbricht CB, Wold MS (1994) Recombinant replication protein A: Expression, complex formation, and functional characterization. *J Biol Chem* 269(15):11121–11132.

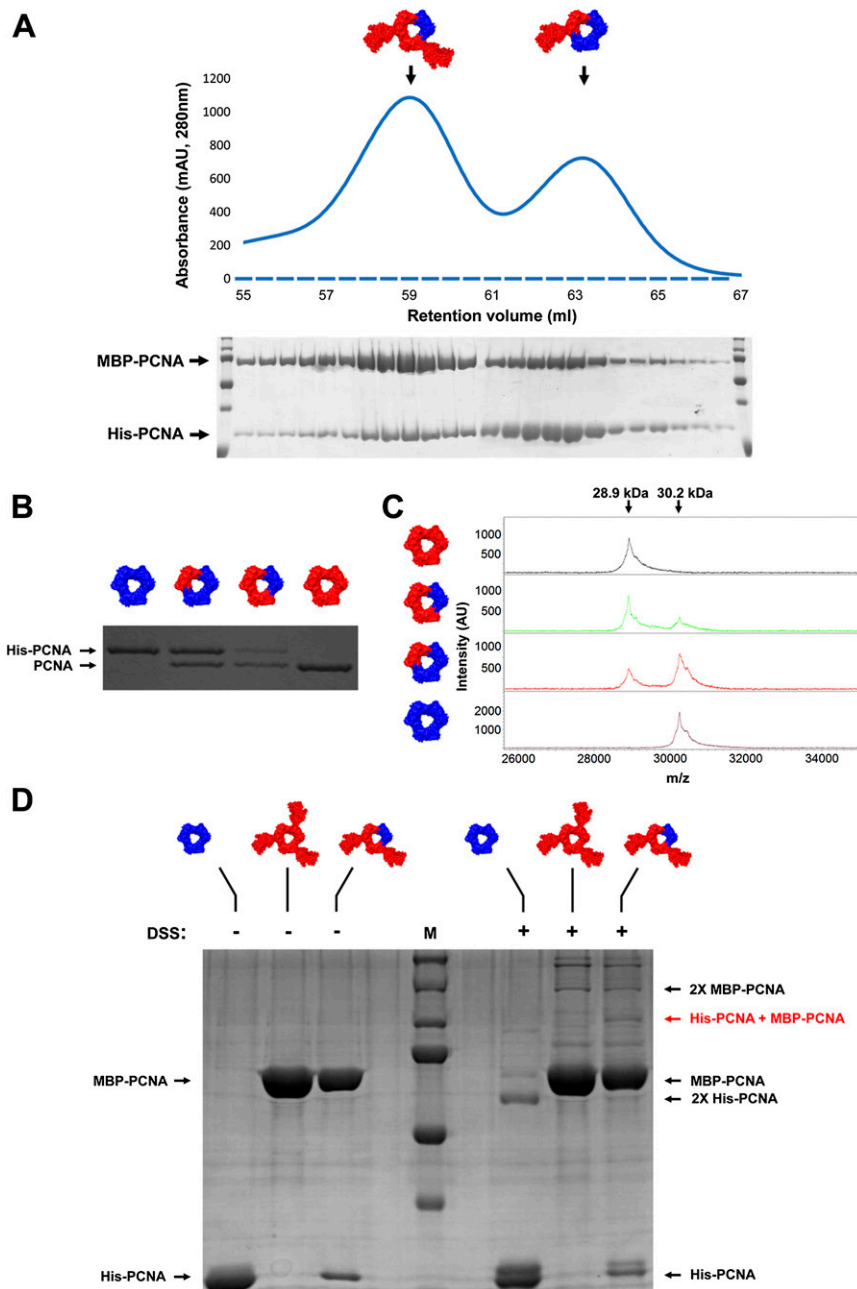

**Fig. S1.** Purification and validation of PCNA heterotrimers. (A) Separation of two heterotrimeric PCNA species, obtained by tandem Ni-NTA and amylose affinity chromatography, by gel filtration chromatography on a Superdex 200 column. (Upper) Chromatogram depicting the separation, including schematic images of the trimer species corresponding to each peak. The dashed blue line below the chromatogram indicates the fractions collected from this run. (Lower) SDS/PAGE analysis of the collected fractions. (B) SDS/PAGE analysis of purified PCNA trimers after MBP-tag cleavage. (C) MALDI-TOF mass spectrometry reveals two peaks at the expected molecular weights for PCNA (after MBP-tag cleavage) and His-tagged PCNA. The heterotrimer samples contain peaks of both sizes at approximately the expected ratios. (D) Cross-linking of neighboring monomers in PCNA trimers. WT PCNA, pcna-7990 and the WT<sub>1</sub>:7990<sub>2</sub> heterotrimer (before MBP-tag cleavage) were cross-linked with disuccinimidyl suberate (DSS) where indicated. A product of ~100 kDa, corresponding to cross-linking between His-tagged PCNA and MBP-tagged PCNA, is visible only in the presence of the heterotrimeric PCNA. M, size marker.

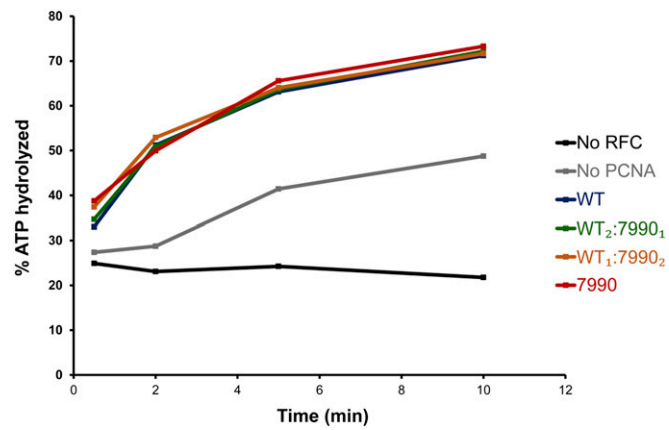

**Fig. S2.** PCNA-dependent ATPase activity of RFC. RFC was incubated with an unblocked oligonucleotide-based primer-template construct, [ $\gamma$ - $^{32}$ P]ATP and various PCNA trimers (*SI Materials and Methods*). Stimulation of RFC ATPase activity in the presence of PCNA and DNA indicates successful loading. Representative results are shown.

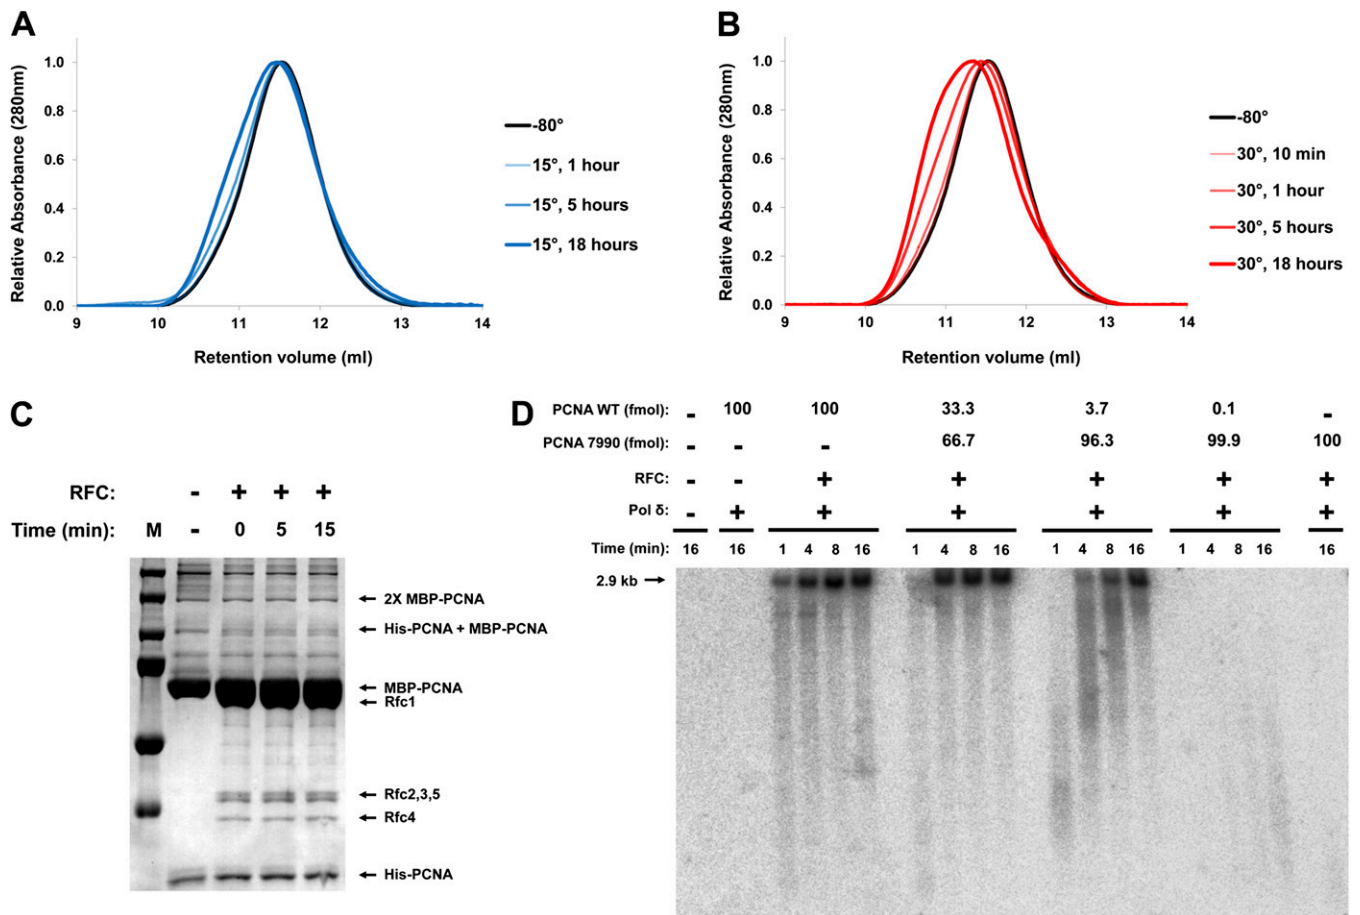

**Fig. 53.** Stability of PCNA heterotrimers. (A and B) The WT<sub>1</sub>:7990<sub>2</sub> heterotrimer was purified as described but without MBP-tag cleavage to allow detection of trimer reassembly. After incubation for various lengths of time (as indicated) at 15 °C (A) or 30 °C (B), the samples were analyzed by gel filtration on a Superdex 200 column. As the initially homogenous population of heterotrimers with two MBP tags undergoes reassembly and gains increasing amounts of trimers with zero, one, or three MBP tags, the chromatogram gains additional peaks on both sides of the central peak and broadens. The maximal peak height has been normalized in all chromatograms, so that peak width represents trimer reassembly. Note that such peak broadening represents only minor reassembly—significant reassembly would lead to the appearance of new peaks at significant distance from the central peak. (C) Cross-linking of PCNA heterotrimers after loading by RFC. WT<sub>1</sub>:7990<sub>2</sub> heterotrimer was purified as described but the MBP tags were not cleaved. We separately verified that the presence of MBP tags does not interfere with loading by RFC using an RFC ATPase assay. The heterotrimer was incubated with RFC, an appropriate DNA construct, and ATP, in conditions similar to RFC ATPase assays described above (Fig. S2). The loading reaction was allowed to proceed for the indicated times before it was stopped and disuccinimidyl suberate (DSS) was added. Changes in the pattern of cross-linking products over time may indicate reassembly of the heterotrimer, but no significant change is visible. M, size marker. (D) Functional examination of PCNA stability using Pol δ assay. Assay was performed as described in Fig. 3A, but mixtures of WT and pcna-7990 homotrimers were used in different ratios as indicated. Products were analyzed by agarose gel electrophoresis and autoradiography. The arrow denotes the fully replicated, 2.9-kb plasmid. Combinatorially, 3.7% is the maximum expected amount of WT homotrimers in case of full reassembly of the WT<sub>1</sub>:7990<sub>2</sub> trimer.
